# Supplementary material for: Genetic and Clinical Characteristics of ARID1A Mutated Melanoma Reveal High Tumor Mutational Load without Implications on Patient Survival
Source: MDPI journal article supplement (doi:10.3390/cancers14092090), 2022-04-22
Supplement: s1 [file s1]

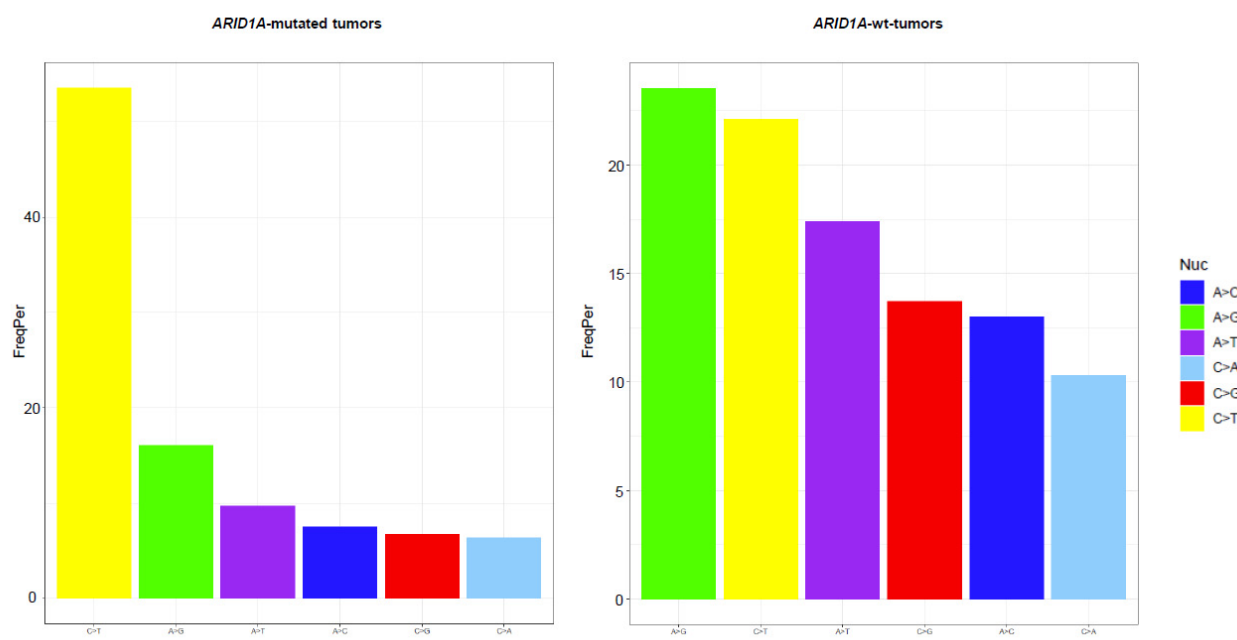

**Figure S1.** *ARID1A* mutated melanoma harbor more C>T substitutions than *ARID1A*-wild type melanoma.

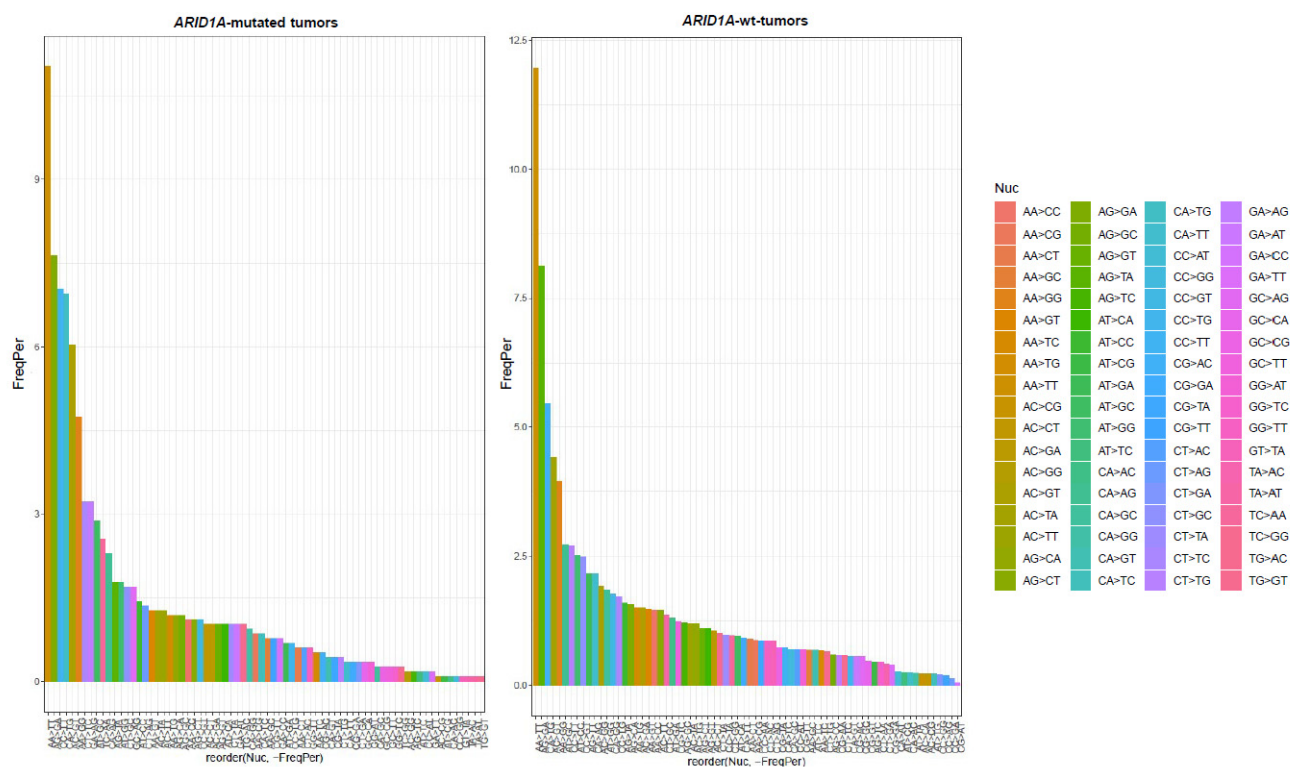

**Figure S2.** *ARID1A* mutated melanoma harbor more CC>TT UV-induced dinucleotide substitutions compared to *ARID1A*-wild type melanoma.

**Table S1.** Mutational overview of BRAF, NRAS, NF1, ARID1A, TERT promoter.

| <b>BRAF</b>                 | <b>NRAS</b> | <b>NF1</b>        | <b>ARID1A</b>                  | <b>TERT Promoter</b> |
|-----------------------------|-------------|-------------------|--------------------------------|----------------------|
| V600K; D66N                 |             | G2052E;<br>M1285I | P848L; S446F                   | 1295228              |
| V600K                       | Q61K        | P2242S            | S1153F                         |                      |
| V600K                       |             |                   | F2103V                         | 1295228              |
| V600E; V600K                | D33E        | W2229*; W425*     | G1849E; G410R                  |                      |
| V600E; S314F                |             | D2005G;<br>W1685* | A837T; M828I                   |                      |
| V600E; R69K                 |             | E2211K;<br>L2116F | M628I; Q1172*                  |                      |
| V600E; R50K                 |             | L2604F; V1677I    | G1267R; H1624Y                 |                      |
| V600E; R165Q                | S65N; V188M | D1485N;<br>S2460L | M1224I; P582S                  | 1295250              |
| V600E; L144S                | Q61R        | F1289S;<br>S1355L | G1282R; K1382R                 | 1295228              |
| V600E; G85D                 |             | G849R;<br>S1566N  | D1231Y; G1996D                 |                      |
| V600E; G219E                | R123G       | K1263E;<br>K2823E | M1215I; S539L                  | 1295250              |
| V600E; A133V                | Q61L        | R2349H;<br>R752K  | P1633S; P690L                  | 1295250              |
| V600E                       |             |                   | D1193G                         |                      |
| V600E                       |             |                   | H1624Y; P1132S                 |                      |
| V600E                       |             |                   | P1966L                         |                      |
| V600E                       |             |                   | P1567S                         |                      |
| V600E                       |             |                   | N906K                          |                      |
| V600E                       |             | V172I             | D1286_R1287delinsC*;<br>Y1285S |                      |
| V600E                       |             |                   | G2040R                         |                      |
| V600E                       |             |                   | R2236H                         |                      |
| V600E                       |             | I1186T;<br>S2543N | M1578I; P225S                  |                      |
| V600E                       |             | Q1255*;<br>S1500N | A1622T; T1198I                 |                      |
| V600E                       |             |                   | P1710S; Q1856*                 |                      |
| V600E                       |             | M1376V            | R1202Q                         |                      |
| V600E                       | Q61K        |                   | G1375S                         | 1295250              |
| V600E                       |             | G72E              | S258F                          | 1295250              |
| V600E                       |             |                   | I1907F                         | 1295250              |
| V600E                       |             |                   | R2183C                         | 1295250              |
| V600E                       |             |                   | M828I; P1568S                  | 1295250              |
| V600E                       |             |                   | P459S                          | 1295250              |
| V600E                       |             |                   | P680L                          | 1295250              |
| V600E                       |             |                   | E1033*; E1033*                 | 1295250              |
| V600E                       |             |                   | S862F                          | 1295228              |
| V600E                       |             |                   | L1607Q                         | 1295228              |
| V600E                       |             | E244G; P2242L     | P380S                          | 1295228              |
| V600E                       |             |                   | P1563S                         | 1295228              |
| V600E                       |             |                   | S735N                          | 1295228              |
| V600E                       |             |                   | R1053C                         | 1295228              |
| V600E                       |             |                   | R1020W                         | 1295228              |
| V600E                       |             |                   | D1850fs; S1929fs               | 1295228              |
| V600E                       |             |                   | L1716F                         | 1295228              |
| V600D                       |             |                   | R1906Q                         | 1295228              |
| V377I                       |             | D832N; V253M      | G1665E; R1566K                 |                      |
| S209_R210delins*;<br>V600fs |             |                   | L2112F                         | 1295250              |
| S16L                        | Q61K; R97K  | V497M             | P1567L; P819L                  | 1295228              |
| R278Q                       | G177E       | G2811R;<br>V2572I | S696F; S936N                   |                      |
| R278*                       | Q61L        | A2333V;<br>Q2636R | P1372L                         |                      |
| Q98*                        |             |                   | P636L; S2179N                  |                      |

|              |             |                   |                   |         |
|--------------|-------------|-------------------|-------------------|---------|
| P75L         |             | A1294T;<br>A2333T | G827D; W1545*     | 1295228 |
| P367S        | Q61L        |                   | S536F             | 1295250 |
| P334Q        |             |                   | Q1145K            |         |
| P29S         | E132K       | P464L; V530I      | P1326fs; P1407S   |         |
| P239L; S363F |             | L2620F            | S574F             | 1295228 |
| P229S; P321S | A66V; G115R | A1294V;<br>E1571K | A905T; P600L      |         |
| N140S        |             | P2758S;<br>T1950I | G443S; Q1974*     |         |
| L313F; V281I | Q61R        | A456T; H2658Y     | Q449*; R2057W     |         |
| L286F; S136L | Q61R; Y157* | A1177V;<br>P2696L | G838R; Q920*      |         |
| G73E         |             |                   | P545L             |         |
| E140K        | G12A        | P458L; W1512*     | P535L; P554S      |         |
| D201N        | P34L        | V1182D            | P1710S            | 1295228 |
| D172E; L204R |             |                   | L1915F            | 1295228 |
|              | V14I        | A132T; L121F      | D2051fs; R1989*   |         |
|              | Q61R        | A152V             | P2095L; Q1631*    |         |
|              | Q61R        |                   | P383S             |         |
|              | Q61K        |                   | Q1131*            |         |
|              | Q61K        |                   | P418S             |         |
|              | Q61K        |                   | P2102L; S2104fs   |         |
|              | Q61K        | V1308L            | P1562L            |         |
|              | Q61K        |                   | Q588*; R1202Q     |         |
|              | Q150P; Q61R | P2792L            | Q309P; Y311fs     |         |
|              | G12S        |                   | E1767*            |         |
|              | A130T       | E1929K; I183T     | Q1098R            |         |
|              |             |                   | P2140L            |         |
|              |             |                   | G1015S; P1642S    |         |
|              |             |                   | P1326fs           |         |
|              |             |                   | V1526M            |         |
|              |             |                   | P739S             |         |
|              |             | M2526I            | H477Y; S825N      |         |
|              |             | D896N;<br>T1184fs | V700A             |         |
|              | Q61R        |                   | P1132A            | 1295250 |
|              | Q61L        |                   | P1213S; P452S     | 1295250 |
|              | Q61L        |                   | P1163S            | 1295250 |
|              | Q61L        |                   | P1240S            | 1295250 |
|              | Q61K        |                   | P729fs            | 1295250 |
|              | Q61K        |                   | Q1894*            | 1295250 |
|              | Q61K        |                   | D1794fs; Q1856*   | 1295250 |
|              |             | R1870L; R440*     | Q1537*            | 1295250 |
|              |             | Q2636*;<br>S2549L | Q1458*            | 1295250 |
|              |             | Q1070*            | P533S             | 1295250 |
|              |             |                   | P2225L            | 1295250 |
|              |             | Q756*             | A2237P            | 1295250 |
|              |             |                   | Q1200*; S682F     | 1295250 |
|              |             | Q1218*            | E1778_Glu1780del  | 1295250 |
|              |             | K1263*            | S1544P            | 1295250 |
|              |             | Q2234*;<br>W1997* | P1667L            | 1295242 |
|              |             | R440*; V951I      | S1338F            | 1295242 |
|              | Q61R        |                   | Q1334_R1335insGln | 1295228 |
|              | Q61L        |                   | H1608Y            | 1295228 |
|              | Q61L        |                   | P2077L            | 1295228 |
|              | Q61L        |                   | P2114L            | 1295228 |
|              | Q61L        | S2817F            | S1338F            | 1295228 |
|              | Q61K; S87N  |                   | A2181fs           | 1295228 |
|              | Q61K        |                   | L1970F; S1516F    | 1295228 |
|              | Q61K        |                   | D1972N            | 1295228 |
|              | Q61K        |                   | S1868F            | 1295228 |
|              | L95P; Q61R  | P1851S;<br>S155G  | E1787K; Q1346H    | 1295228 |

|                   |                |         |
|-------------------|----------------|---------|
| R2812Q; Y794*     | F2103L         | 1295228 |
| C454Y             | M1661I; P1325L | 1295228 |
| R1306Q;<br>W1236* | S1868F         | 1295228 |
| Q1255*            | S499L          | 1295228 |
| L300fs; Q1515*    | A900T          | 1295228 |
| S1991Y            | P1115S         | 1295228 |
| L161fs            | R1461*         | 1295228 |
| Q853*; S2754F     | P1667S         | 1295228 |
| R1241*;<br>S1567L | P1307L; P1325F | 1295228 |
|                   | M1215I         | 1295228 |

**Table S2.** Genes covered in the applied sequencing panel.

| Nr. | Gene              | Chr | Start     | End       | Primary Melanoma type | Nr. Targets |
|-----|-------------------|-----|-----------|-----------|-----------------------|-------------|
| 1   | <i>TERT</i> prom. | 5   | 1295200   | 1295280   | cutaneous             | 2           |
| 2   | <i>BRAF</i>       | 7   | 140419127 | 140624564 | cutaneous             | 95          |
| 3   | <i>NRAS</i>       | 1   | 115247085 | 115259515 | cutaneous             | 7           |
| 4   | <i>HRAS</i>       | 11  | 532242    | 537287    | cutaneous             | 8           |
| 5   | <i>KRAS</i>       | 12  | 25357723  | 25403870  | cutaneous             | 14          |
| 6   | <i>KIT</i>        | 4   | 55524085  | 55606881  | cutaneous             | 34          |
| 7   | <i>RAC1</i>       | 7   | 6414126   | 6443608   | cutaneous             | 9           |
| 8   | <i>NF1</i>        | 17  | 29421945  | 29709134  | cutaneous             | 111         |
| 9   | <i>TP53</i>       | 17  | 7565097   | 7590863   | cutaneous             | 18          |
| 10  | <i>CDKN2A</i>     | 9   | 21967751  | 21995300  | cutaneous             | 26          |
| 11  | <i>GNAQ</i>       | 9   | 80331003  | 80646374  | uveal                 | 14          |
| 12  | <i>GNA11</i>      | 19  | 3094408   | 3124002   | uveal                 | 14          |
| 13  | <i>PTEN</i>       | 10  | 89622870  | 89731687  | cutaneous             | 14          |
| 14  | <i>CDK4</i>       | 12  | 58141510  | 58149796  | cutaneous             | 11          |
| 15  | <i>ARID1A</i>     | 1   | 27022522  | 27108601  | cutaneous             | 67          |
| 16  | <i>ARID2</i>      | 12  | 46123448  | 46301823  | cutaneous             | 56          |
| 17  | <i>SMARCA4</i>    | 19  | 11071598  | 11176071  | cutaneous             | 60          |
| 18  | <i>MAP2K1</i>     | 15  | 66679155  | 66784650  | cutaneous             | 35          |
| 19  | <i>MAP2K2</i>     | 19  | 4090319   | 4124126   | cutaneous             | 35          |
| 20  | <i>CTNNB1</i>     | 3   | 41236328  | 41301587  | cutaneous             | 27          |
| 21  | <i>PIK3CA</i>     | 3   | 178865902 | 178957881 | cutaneous             | 37          |
| 22  | <i>EZH2</i>       | 7   | 148504464 | 148581441 | cutaneous             | 30          |
| 23  | <i>IDH1</i>       | 2   | 209100951 | 209130798 | cutaneous             | 15          |
| 24  | <i>FBXW7</i>      | 4   | 153242410 | 153457253 | cutaneous             | 33          |
| 25  | <i>WT1</i>        | 11  | 32409321  | 32457176  | cutaneous             | 21          |
| 26  | <i>SF3B1</i>      | 2   | 198254508 | 198299815 | uveal                 | 48          |
| 27  | <i>BAP1</i>       | 3   | 52435024  | 52444366  | uveal                 | 30          |
| 28  | <i>PIK3R1</i>     | 5   | 67511548  | 67597649  | cutaneous             | 32          |
| 29  | <i>MITF</i>       | 3   | 69788586  | 70017488  | cutaneous             | 31          |
| 30  | <i>TERT</i>       | 5   | 1253147   | 1295068   | cutaneous             | 36          |

**Table S3.** Clinical characteristics of patients receiving non-adjuvant systemic therapy.

| Variable (n = 37) |           |
|-------------------|-----------|
| Age               |           |
| Median            | 64        |
| Range             | 38 - 87   |
| ≤60               | 14 (37.8) |
| >60               | 23 (62.2) |
| Sex               |           |
| Female            | 15 (40.5) |
| Male              | 22 (59.5) |
| Primary Tumor     |           |
| Cutaneous         | 29 (78.4) |
| Mucosal           | 1 (2.7)   |
| Occult            | 7 (18.9)  |
| Ulceration        |           |
| Present           | 14 (37.8) |
| Missing           | 8 (21.7)  |

|                                   |           |
|-----------------------------------|-----------|
| Unknown                           | 15 (40.5) |
| <b>Sentinel Lymph Node Biopsy</b> |           |
| Positive                          | 7 (18.9)  |
| Negative                          | 12 (32.4) |
| Not performed                     | 18 (48.6) |
| <b>PD-L1</b>                      |           |
| Positive                          | 10 (27.0) |
| Negative                          | 21 (56.8) |
| Unknown                           | 6 (16.2)  |
| <b>LDH at therapy start</b>       |           |
| Elevated                          | 4 (10.8)  |
| WNL                               | 19 (51.4) |
| Unknown                           | 14 (37.8) |
| <b>Therapies</b>                  |           |
| PD1 Mono                          | 11 (29.7) |
| PD1 + CTLA4                       | 16 (43.2) |
| Dabra Trame                       | 7 (18.9)  |
| Vemura Cobi                       | 2 (5.4)   |
| Enco Bine                         | 1 (2.7)   |
| <b>Metastatic organs</b>          |           |
| <3 Organs                         | 25 (67.5) |
| ≥3 Organs                         | 12 (32.5) |
